# Supplementary material for: 19S Proteasome Subunits as Oncogenes and Prognostic Biomarkers in FLT3-Mutated Acute Myeloid Leukemia (AML)
Source: MDPI journal article supplement (doi:10.3390/ijms232314586), 2022-11-23
Supplement: s1 [file s1]

## SUPPLEMENTAL INFORMATION

### **19S Proteasome Subunits as Oncogenes and Prognostic Biomarkers in FLT3-Mutated Acute Myeloid Leukemia (AML)**

Joshua J. Lara<sup>1,2†</sup>, Alfonso E. Bencomo-Alvarez<sup>3†</sup>, Mayra A. Gonzalez<sup>3</sup>, Idaly M. Olivas<sup>2,3</sup>, James E. Young<sup>2</sup>, Jose L. Lopez<sup>1</sup>, Vanessa V. Velazquez<sup>1</sup>, Steven Glover<sup>2</sup>, Mehrshad Keivan<sup>2</sup>, Andres J. Rubio<sup>1-3</sup>, Sara K. Dang<sup>1,2</sup>, Jonathan P. Solecki<sup>2</sup>, Jesse C. Allen<sup>1</sup>, Desiree N. Tapia<sup>1</sup>, Boranai Tychhon<sup>1</sup>, Gonzalo E. Astudillo<sup>1</sup>, Connor Jordan<sup>2</sup>, Darshan S. Chandrashekar<sup>4</sup>, and Anna M. Eiring<sup>1-3\*</sup>

<sup>1</sup>Paul L. Foster School of Medicine, Texas Tech University Health Sciences Center at El Paso, El Paso, TX, USA; <sup>2</sup>L. Frederick Francis Graduate School of Biomedical Sciences, Texas Tech University Health Sciences Center at El Paso, El Paso, TX, USA; <sup>3</sup>Center of Emphasis in Cancer, Department of Molecular and Translational Medicine, Texas Tech University Health Sciences Center at El Paso, El Paso, TX, USA; <sup>4</sup>Department of Pathology-Molecular & Cellular, University of Alabama at Birmingham, Birmingham, AL, USA.

\*Corresponding Author: Anna M. Eiring, PhD; 5001 El Paso Drive, MSC 32002, MSB1 Room 2112, El Paso, TX 79905, USA; Ph: (915) 215-4812; E-Mail: [anna.eiring@ttuhsc.edu](mailto:anna.eiring@ttuhsc.edu).

† These authors contributed equally to this work.

## SUPPLEMENTAL TABLES

| Protein                                                    | Description                                                    | FC       | Log2(FC) | TTEST    |
|------------------------------------------------------------|----------------------------------------------------------------|----------|----------|----------|
| <b><i>Proteins upregulated after PSMD3 knockdown</i></b>   |                                                                |          |          |          |
| NRM                                                        | Nurim                                                          | 22.789   | 4.510    | 0.037    |
| TAF6                                                       | Transcription initiation factor TFIID subunit 6                | 4.059    | 2.021    | 0.089    |
| UBE3A                                                      | Ubiquitin-protein ligase E3A                                   | 2.596    | 1.376    | 0.074    |
| RANBP9                                                     | Ran-binding protein 9                                          | 2.383    | 1.253    | 0.094    |
| ATP6V0D1                                                   | V-type proton ATPase subunit                                   | 2.171    | 1.119    | 0.088    |
| SNRPA1                                                     | U2 small nuclear ribonucleoprotein A                           | 1.851    | 0.889    | 0.096    |
| PDRG1                                                      | p53 and DNA damage-regulated protein 1                         | 1.846    | 0.884    | 0.064    |
| TMX4                                                       | Thioredoxin-related transmembrane protein 4                    | 1.713    | 0.777    | 0.003    |
| MLF2                                                       | Myeloid leukemia factor 2                                      | 1.696    | 0.762    | 0.079    |
| MSH6                                                       | DNA mismatch repair protein Msh6                               | 1.695    | 0.761    | 0.078    |
| RPAP1                                                      | RNA polymerase II-associated protein 1                         | 1.690    | 0.757    | 0.030    |
| TMEM214                                                    | Transmembrane protein 214                                      | 1.650    | 0.722    | 0.012    |
| RFC1                                                       | Replication factor C subunit 1                                 | 1.641    | 0.715    | 0.098    |
| VPS36                                                      | Vacuolar protein-sorting-associated protein 36                 | 1.630    | 0.704    | 0.007    |
| PEBP1                                                      | Phosphatidylethanolamine-binding protein 1                     | 1.627    | 0.702    | 0.061    |
| NUDT1                                                      | 7,8-dihydro-8-oxoguanine triphosphatase                        | 1.625    | 0.701    | 0.031    |
| CRYZ                                                       | Quinone oxidoreductase                                         | 1.563    | 0.645    | 0.049    |
| MPI                                                        | Mannose-6-phosphate isomerase                                  | 1.552    | 0.634    | 0.039    |
| <b><i>Proteins downregulated after PSMD3 knockdown</i></b> |                                                                |          |          |          |
| BLMH                                                       | Bleomycin hydrolase                                            | 0.690025 | -0.53528 | 0.099088 |
| EEF1A1                                                     | Elongation factor 1-alpha 1                                    | 0.661475 | -0.59624 | 0.027017 |
| RPL36                                                      | 60S ribosomal protein L36                                      | 0.658609 | -0.60251 | 0.026183 |
| HBG1                                                       | Hemoglobin subunit gamma-1                                     | 0.645747 | -0.63096 | 0.012411 |
| MATK                                                       | Tyrosine-protein kinase                                        | 0.641135 | -0.6413  | 0.054298 |
| SYPL1                                                      | Synaptophysin-like protein 1                                   | 0.6184   | -0.69339 | 0.072819 |
| PRKAR2A                                                    | cAMP-dependent protein kinase type II-alpha regulatory subunit | 0.55575  | -0.84749 | 0.042249 |
| PSMD4                                                      | 26S proteasome non-ATPase regulatory subunit 4                 | 0.472821 | -1.08063 | 0.009376 |

**Table S1. Up- and down-regulated proteins after PSMD3 knockdown in MOLM-13 cells.**

| Protein                                                    | Description                                              | FC      | Log2(FC) | TTEST    |
|------------------------------------------------------------|----------------------------------------------------------|---------|----------|----------|
| <b><i>Proteins upregulated after PSMD3 knockdown</i></b>   |                                                          |         |          |          |
| LGALS9                                                     | Galectin-9                                               | 837.149 | 9.709    | 6.27E-05 |
| DOCK10                                                     | Dedicator of cytokinesis protein 10                      | 379.194 | 8.567    | 0.000285 |
| LYZ                                                        | Lysozyme C                                               | 373.816 | 8.546    | 0.00301  |
| KCTD12                                                     | BTB/POZ domain-containing protein KCTD12                 | 250.127 | 7.967    | 0.000956 |
| PSMB8                                                      | Proteasome subunit beta type-8                           | 242.776 | 7.923    | 0.003202 |
| PGM1                                                       | Phosphoglucomutase-1                                     | 219.534 | 7.778    | 0.000137 |
| TRIM22                                                     | E3 ubiquitin-protein ligase TRIM22                       | 179.361 | 7.487    | 0.010181 |
| SLC16A3                                                    | Monocarboxylate transporter 4                            | 149.597 | 7.225    | 0.000444 |
| HLA-DRB1                                                   | HLA class II histocompatibility antigen, DRB1 beta chain | 147.262 | 7.202    | 0.001186 |
| ABRACL                                                     | Costars family protein ABRACL                            | 141.745 | 7.147    | 2.39E-08 |
| MNDA                                                       | Myeloid cell nuclear differentiation antigen             | 136.899 | 7.097    | 0.000189 |
| IFI16                                                      | Gamma-interferon-inducible protein 16                    | 114.283 | 6.836    | 6.49E-05 |
| STK10                                                      | Serine/threonine-protein kinase 10                       | 113.218 | 6.823    | 0.040061 |
| SERPINB8                                                   | Serpin B8                                                | 102.974 | 6.686    | 0.044555 |
| CRIP1                                                      | Cysteine-rich protein 1                                  | 102.304 | 6.677    | 0.006293 |
| S100A4                                                     | Protein S100-A4                                          | 99.441  | 6.636    | 0.014281 |
| MYO1G                                                      | Unconventional myosin-Ig                                 | 97.329  | 6.605    | 7.83E-05 |
| ITPR1                                                      | Inositol 1,4,5-trisphosphate receptor type 1             | 83.020  | 6.375    | 0.015038 |
| <b><i>Proteins downregulated after PSMD3 knockdown</i></b> |                                                          |         |          |          |
| PRAME                                                      | Melanoma antigen preferentially expressed in tumors      | 0.006   | -7.280   | 0.000281 |
| HBZ                                                        | Hemoglobin subunit zeta                                  | 0.010   | -6.717   | 2.48E-06 |
| SDF4                                                       | 45 kDa calcium-binding protein                           | 0.011   | -6.555   | 0.000119 |
| SLC38A2                                                    | Sodium-coupled neutral amino acid transporter 2          | 0.012   | -6.440   | 0.000319 |
| GATA1                                                      | Erythroid transcription factor                           | 0.012   | -6.343   | 0.000354 |
| AKR1C2                                                     | Aldo-keto reductase family 1 member C2                   | 0.013   | -6.271   | 0.000372 |
| NOP53                                                      | Ribosome biogenesis protein NOP53                        | 0.014   | -6.209   | 0.015708 |
| DMD                                                        | Dystrophin                                               | 0.014   | -6.191   | 0.02311  |
| RHAG                                                       | Ammonium transporter Rh type A                           | 0.015   | -6.107   | 0.000107 |
| UBP1                                                       | Upstream-binding protein 1                               | 0.017   | -5.911   | 0.011178 |
| IFITM1                                                     | Interferon-induced transmembrane protein 1               | 0.017   | -5.894   | 1.12E-05 |
| LIN28B                                                     | Protein lin-28 homolog B                                 | 0.017   | -5.854   | 9.44E-05 |
| TMEM263                                                    | Transmembrane protein 263                                | 0.018   | -5.833   | 0.003264 |
| VIPAS39                                                    | Spermatogenesis-defective protein 39 homolog             | 0.019   | -5.692   | 1E-05    |
| NFE2                                                       | Transcription factor NF-E2 45 kDa subunit                | 0.022   | -5.506   | 0.005064 |
| FADS3                                                      | Fatty acid desaturase 3                                  | 0.022   | -5.479   | 6.66E-06 |
| HBG1                                                       | Hemoglobin subunit gamma-1                               | 0.023   | -5.417   | 9.96E-05 |
| CA1                                                        | Carbonic anhydrase 1                                     | 0.024   | -5.382   | 2E-05    |

**Table S2. Up- and down-regulated proteins after PSMD3 knockdown in MOLM-14 cells.**

| <b>Vector</b>                                                      | <b>Vendor</b>            | <b>Catalog #</b> |
|--------------------------------------------------------------------|--------------------------|------------------|
| <i>psPAX2</i>                                                      | Addgene                  | 12260            |
| <i>VSV.G</i>                                                       | Addgene                  | 14888            |
| <i>shPSMD3</i>                                                     | Cellecta, Inc.           | CVSHC-PX         |
| <i>shPSMD3 Sequence:</i>                                           |                          |                  |
| ACCGGCTGGGGTGTCTTGGTTTGTATGTTAATATTCATAGCATACAAGCCAAGACATCCCAGTTTT |                          |                  |
| <i>Non-Targeting shRNA (shNT)</i>                                  | Cellecta, Inc.           | CVSHC-PX         |
| <i>pGreenFire1-NF-<math>\kappa</math>B Lentivector</i>             | System Biosciences, LLC. | TR012PA-N        |

**Table S3. Lentiviral vectors for virus production.** NF- $\kappa$ B, nuclear factor-kappa B (p65); psPAX2, empty backbone 2nd generation lentiviral packaging plasmid; shRNA, small hairpin ribonucleic acid; shPSMD3, shRNA vector targeting proteasome 26S subunit, non-ATPase 3; VSV.G, envelope vesicular stomatitis virus G glycoprotein plasmid.

| <b>Name</b>  | <b>Forward Primer (5'&gt;3')</b> | <b>Reverse Primer (5'&gt;3')</b> |
|--------------|----------------------------------|----------------------------------|
| <i>GUSB</i>  | GAAAATATGTGGTTGGAGAGCTCATT       | CCGAGTGAAGATCCCCTTTTAA           |
| <i>PSMD3</i> | ATCACGCCCGGGTCTATGAG             | ATGCCGAAGCGTAGCTGTCC             |

**Table S4. Primer sequences for RT-qPCR.** GUSB, glucuronidase beta; PSMD3, proteasome 26S subunit, non-ATPase 3.

| <b>Name</b>                                                                  | <b>Vendor</b>             | <b>Catalog #</b> |
|------------------------------------------------------------------------------|---------------------------|------------------|
| <i>Rabbit polyclonal anti-<math>\alpha</math>/<math>\beta</math>-tubulin</i> | Cell Signaling Technology | 2148S            |
| <i>Anti-rabbit IgG, HRP-linked Antibody</i>                                  | Cell Signaling Technology | 7074             |
| <i>Rabbit polyclonal anti-PSMD3</i>                                          | Bethyl Laboratories Inc.  | A303-826A        |
| <i>Rabbit polyclonal anti-Ub (FL-76)</i>                                     | Santa Cruz Biotechnology  | sc-9133          |
| <i>Mouse monoclonal anti-<math>\beta</math>-actin</i>                        | Sigma-Aldrich             | A5441            |

**Table S5. Antibodies for immunoblot.** HRP, horseradish peroxidase; IgG, immunoglobulin G; NF- $\kappa$ B, nuclear factor-kappa B p65; PSMD3, proteasome 26S subunit, non-ATPase 3; STAT3, signal transducer and activator of transcription 3; Ub, ubiquitin.

## SUPPLEMENTAL FIGURES

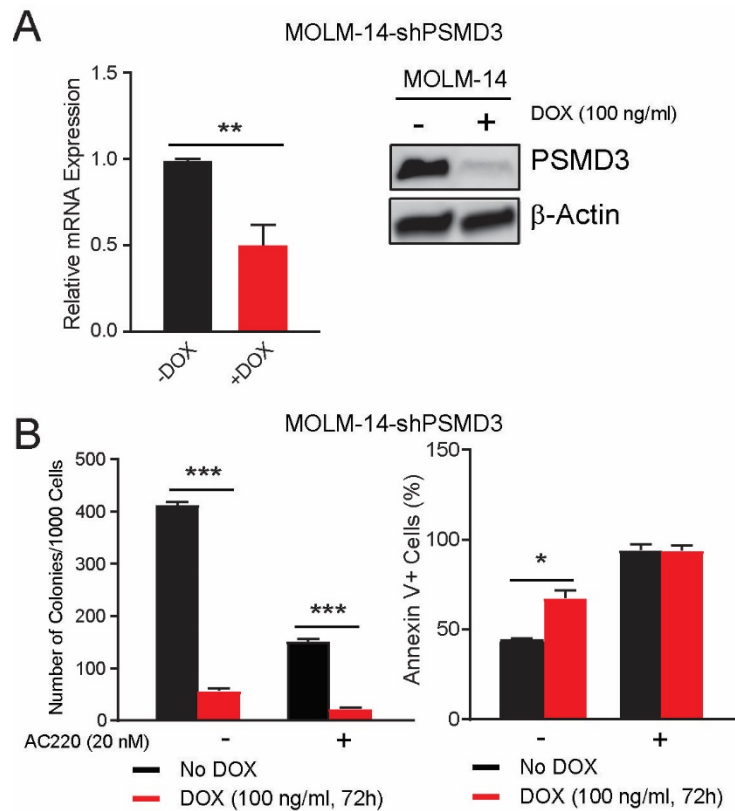

**Figure S1. shRNA-mediated PSMD3 (shPSMD3) knockdown impaired survival of the FLT3-mutated AML cell line, MOLM-14, with significant effects on apoptosis. (A)** Bar graph (left) and immunoblots (right) show PSMD3 knockdown at the mRNA and protein level, respectively, in MOLM-14-shPSMD3 cells cultured with and without doxycycline (DOX, 100 ng/ml, 72 h). **(B)** Bar graphs show the effect of shPSMD3 on survival in colony formation (left) and late apoptosis (right) in MOLM-14 cells cultured  $\pm$  doxycycline (DOX, 100 ng/ml, 72 h) and  $\pm$  quizartinib (AC220, 20 nM, 72 h). Error bars represent the standard error of the mean (SEM). \*  $p < 0.05$ ; \*\*  $p < 0.01$ ; \*\*\*  $p < 0.001$ .

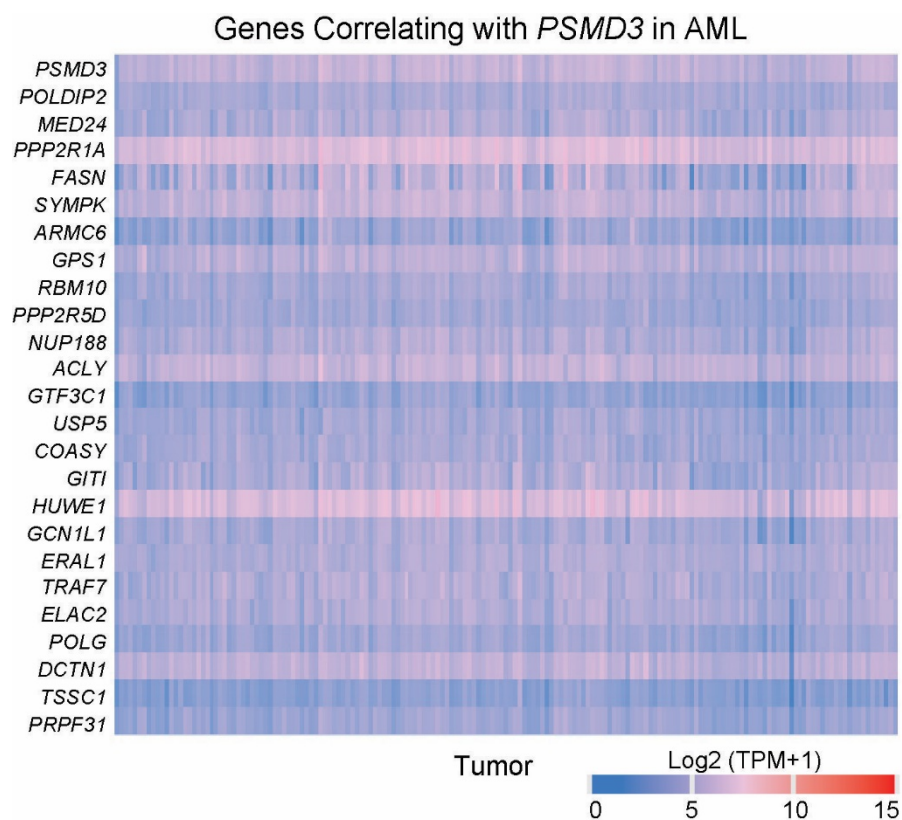

**Figure S2.** TCGA data available at UALCAN revealed the gene sets upregulated with *PSMD3* in AML. The heatmap shows the genes that are co-expressed with *PSMD3* in AML TCGA data, as calculated using UALCAN ([http://ualcan/path.uab.edu/](http://ualcan.path.uab.edu/), accessed on July 30, 2021).

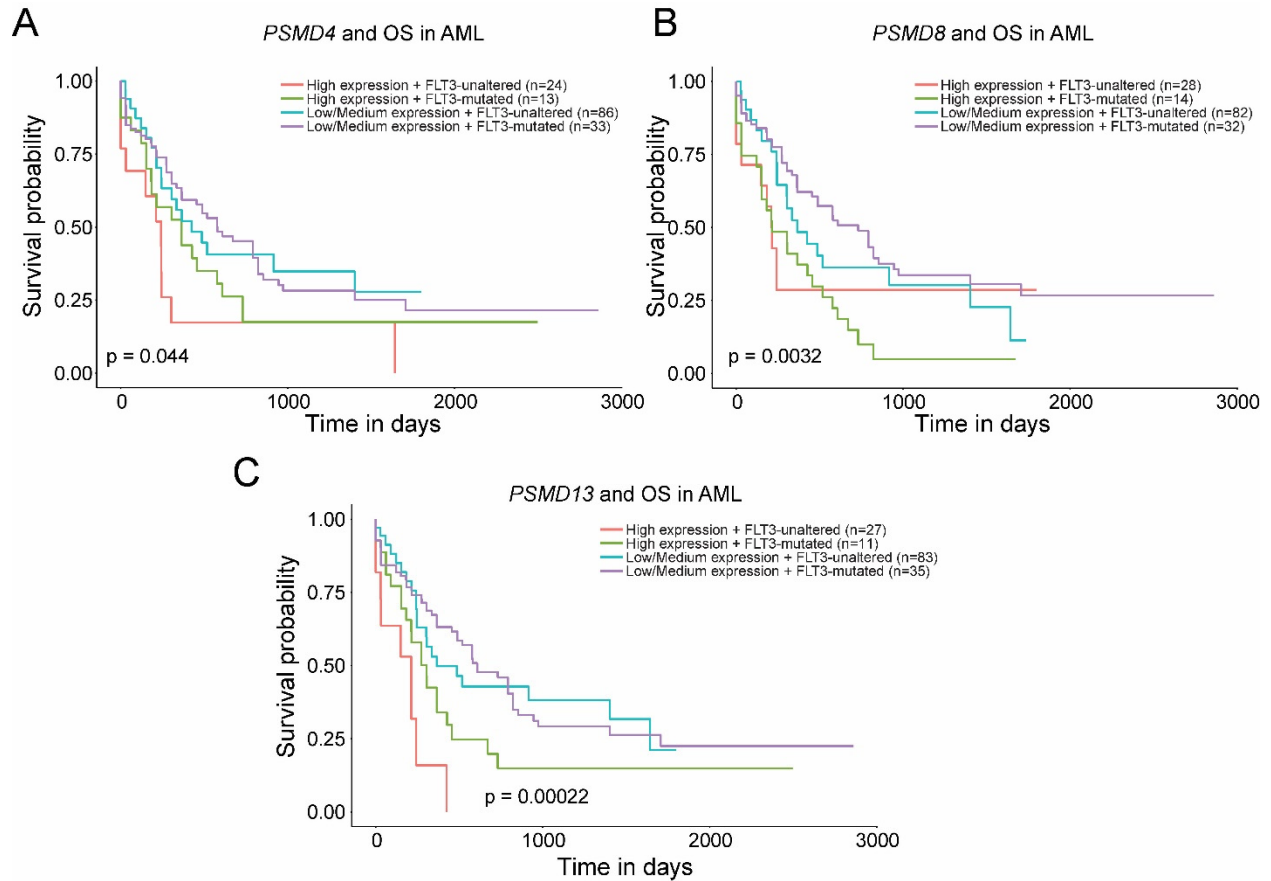

**Figure S3. High levels of *PSMD4*, *PSMD8*, and *PSMD13* mRNA expression correlated with worse overall survival (OS) in acute myeloid leukemia (AML).** (A-C) Kaplan-Meier curves generated in UALCAN (<http://ualcan.path.uab.edu/>, accessed on July 29, 2021) show OS for AML patients in the TCGA database, stratified by high versus low *PSMD4* (A), *PSMD8* (B), and *PSMD13* (C) mRNA expression levels and FLT3 mutation status.

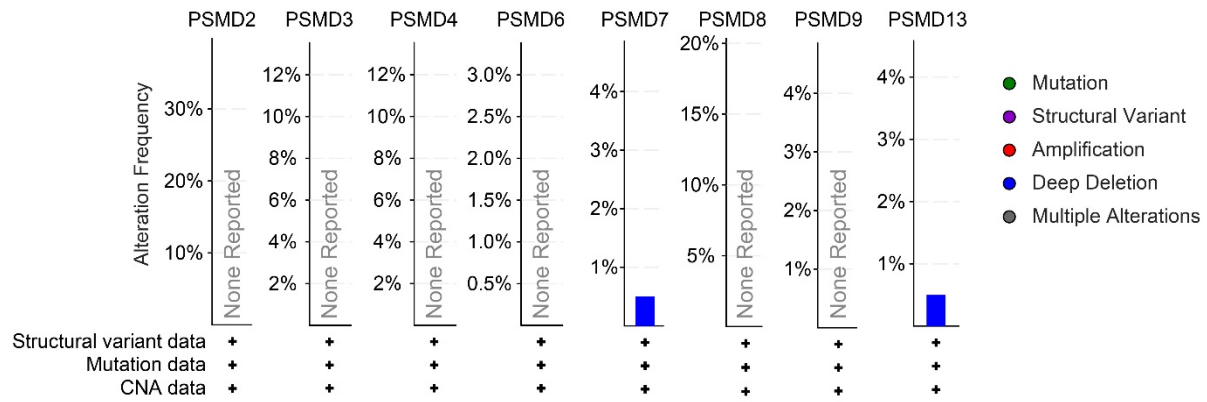

**Figure S4. Genomic alterations in the genes encoding PSMD proteasome subunits whose expression correlated with OS in FLT3-mutated AML.** Using data from cBioPortal (<https://www.cbioportal.org/>, accessed on July 30, 2021), we analyzed genomic alterations associated with *PSMD2*, *PSMD3*, *PSMD4*, *PSMD6*, *PSMD7*, *PSMD8*, *PSMD9*, and *PSMD13* in AML patients. Deep deletions were detected in the genes encoding *PSMD7* and *PSMD13*; no other genomic mutations were reported for these genes in AML.
